# Supplementary material
Source: HighWire-hosted journal article supplement (https://www.cmajopen.ca/highwire/filestream/89428/field_highwire_adjunct_files/2/open-2022-0103-3-at.pdf)
Supplement: open-2022-0103-3-at.pdf [file open-2022-0103-3-at.pdf]

**Supplemental Table 2a. Mean average error (MAE) according to vigintiles of LOS in the derivation cohort.**

| <b>Vigintile</b> | <b>Mean observed LOS (Days)</b> | <b>Mean predicted LOS (Days)</b> | <b>MAE</b> |
|------------------|---------------------------------|----------------------------------|------------|
| 1                | 5.1                             | 5.0                              | .9         |
| 2                | 5.4                             | 5.4                              | 1.1        |
| 3                | 5.5                             | 5.6                              | 1.2        |
| 4                | 5.7                             | 5.8                              | 1.3        |
| 5                | 5.8                             | 6.0                              | 1.3        |
| 6                | 6.0                             | 6.1                              | 1.5        |
| 7                | 6.2                             | 6.3                              | 1.6        |
| 8                | 6.3                             | 6.4                              | 1.6        |
| 9                | 6.6                             | 6.6                              | 1.8        |
| 10               | 6.8                             | 6.8                              | 1.8        |
| 11               | 7.0                             | 7.0                              | 1.9        |
| 12               | 7.3                             | 7.2                              | 2.1        |
| 13               | 7.6                             | 7.5                              | 2.3        |
| 14               | 7.8                             | 7.8                              | 2.4        |
| 15               | 8.4                             | 8.2                              | 2.7        |
| 16               | 8.8                             | 8.7                              | 3.0        |
| 17               | 9.6                             | 9.3                              | 3.5        |
| 18               | 10.5                            | 10.3                             | 4.1        |
| 19               | 11.9                            | 11.6                             | 4.7        |
| 20               | 13.6                            | 14.6                             | 5.6        |

Appendix 3, as supplied by the authors. Appendix to: Fottinger A, Eddeen AB, Lee DS, et al. Derivation and validation of pragmatic clinical models to predict hospital length of stay after cardiac surgery in Ontario, Canada: a population-based cohort study. *CMAJ Open* 2023. doi:10.9778/cmajo.2022-0103. Copyright © 2023 The Author(s) or their employer(s). To receive this resource in an accessible format, please contact us at [cmaigroup@cmaj.ca](mailto:cmaigroup@cmaj.ca).

**Supplemental Table 2b. Mean average error (MAE) according to vigintiles of LOS in the validation cohort.**

| Vigintile | Mean observed LOS (Days) | Mean predicted LOS (Days) | MAE |
|-----------|--------------------------|---------------------------|-----|
| 1         | 4.9                      | 5.1                       | 1.0 |
| 2         | 5.1                      | 5.5                       | 1.2 |
| 3         | 5.3                      | 5.7                       | 1.3 |
| 4         | 5.4                      | 5.9                       | 1.4 |
| 5         | 5.4                      | 6.0                       | 1.4 |
| 6         | 5.7                      | 6.2                       | 1.5 |
| 7         | 5.8                      | 6.3                       | 1.6 |
| 8         | 6.0                      | 6.5                       | 1.7 |
| 9         | 6.1                      | 6.6                       | 1.7 |
| 10        | 6.3                      | 6.8                       | 1.9 |
| 11        | 6.6                      | 7.0                       | 2.1 |
| 12        | 6.7                      | 7.2                       | 2.1 |
| 13        | 7.0                      | 7.5                       | 2.3 |
| 14        | 7.2                      | 7.8                       | 2.4 |
| 15        | 7.6                      | 8.1                       | 2.6 |
| 16        | 8.6                      | 8.6                       | 3.1 |
| 17        | 8.7                      | 9.3                       | 3.4 |
| 18        | 10.0                     | 10.2                      | 4.1 |
| 19        | 11.3                     | 11.5                      | 4.8 |
| 20        | 13.3                     | 14.5                      | 5.6 |

Appendix 3, as supplied by the authors. Appendix to: Fottinger A, Eddeen AB, Lee DS, et al. Derivation and validation of pragmatic clinical models to predict hospital length of stay after cardiac surgery in Ontario, Canada: a population-based cohort study. *CMAJ Open* 2023. doi:10.9778/cmajo.2022-0103. Copyright © 2023 The Author(s) or their employer(s). To receive this resource in an accessible format, please contact us at [cmaigroup@cmaj.ca](mailto:cmaigroup@cmaj.ca).
